# Supplementary material for: CRL4DCAF2 negatively regulates IL-23 production in dendritic cells and limits the development of psoriasis
Source: PubMed Central journal article supplement — J Exp Med. 2018 Aug 6;215(8):1999–2017. doi: 10.1084/jem.20180210 (PMC6080916; doi:10.1084/jem.20180210), 2018-08-06
Supplement: JEM_20180210_sm.pdf [file JEM_20180210_sm.pdf]

Supplemental material

Huang et al., <https://doi.org/10.1084/jem.20180210>

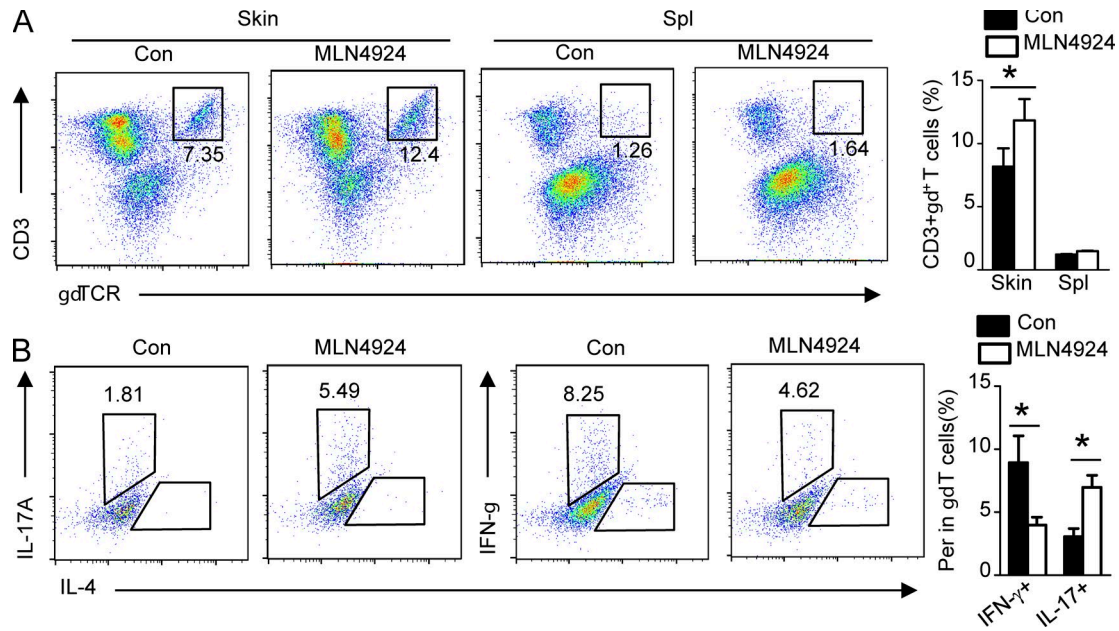

Figure S1. **MLN4924 enhances the frequent of IL-17-producing  $\gamma\delta$ T cells under inflammatory condition.** (A) Representative plots and bar graphs represented flow cytometry analysis of  $\gamma\delta$ T cells localized at skin and Spl of mice treated with MLN4924. (B) Flow cytometry analysis of IFN- $\gamma$  and IL-17 positive cells gating with  $\gamma\delta$ T cells in the skin of mice treated with MLN4924. Data are representative of three independent experiments. Error bars show mean  $\pm$  SEM. Significance was determined by two-tailed Student's *t* test (\*,  $P < 0.05$ ).

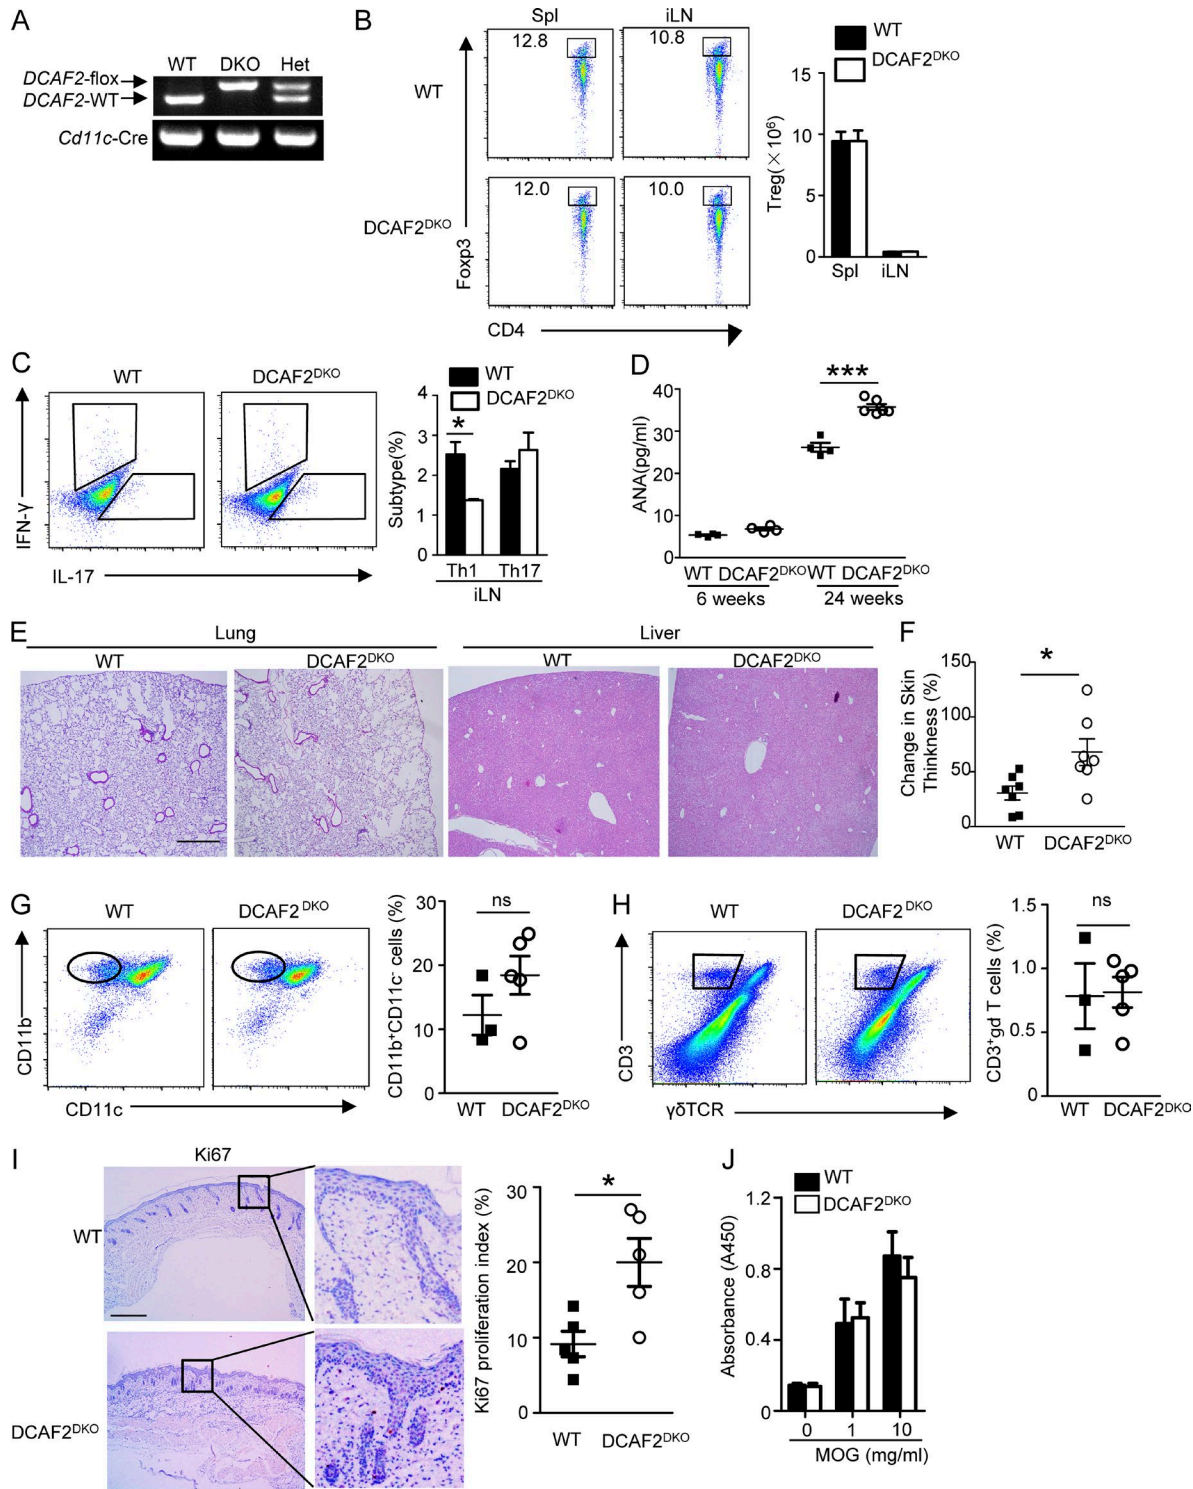

**Figure S2. DCAF2 deficiency promotes autoimmune symptom in psoriasis mice or nontreated aging mice.** (A) Genotyping PCR of DCAF2-flox and WT alleles or the *Cd11c-Cre*. (B) The absolute cell numbers of T reg cells in Spl or iLN. (C) Flow cytometric analysis of the percentage of IFN- $\gamma$ - and IL-17-producing CD4<sup>+</sup> T cells in the iLN of 6-wk-old WT and DCAF2<sup>DKO</sup> mice. (D) The ANA antibody in serum of young (6 wk) or older (24 wk) mice was examined by ELISA. (E) H&E staining of the indicated tissue sections from 6-wk-old WT and DCAF2<sup>DKO</sup> mice. Bar, 200  $\mu$ m. (F) WT and DCAF2<sup>DKO</sup> mice ( $n = 8$ /group) were treated with Aldara for 6 d. Plots graphs represented percent change in skin thickness. (G–H) Plots and summary graphs represented flow cytometry analysis of inflamed skin of psoriasis mice. Cells were gated on CD45<sup>+</sup>CD11b<sup>+</sup>CD11c<sup>-</sup> or CD45<sup>+</sup>CD3<sup>+</sup> $\gamma$  $\delta$ TCR<sup>-</sup> for the presence of skin-infiltrating myeloid and  $\alpha$  $\beta$ T cells. (I) Immunohistochemical detection of the proliferation marker Ki67 in keratinocytes from psoriatic WT and DCAF2<sup>DKO</sup> mice (brown staining). Ki67 proliferation index (%) calculated as Ki67-positive layer cells divided by total basal layer cells  $\times$  100. Bar, 200  $\mu$ m. (J) WT and DCAF2<sup>DKO</sup> mice were subjected to MOG35-55-induced EAE ( $n = 3$ /group). Cell proliferation assays of splenic T cells were evaluated by CCK8 from day 15 EAE-induced mice, stimulated in vitro with the indicated concentrations of MOG-peptide. Data are representative of three independent experiments. Error bars show mean  $\pm$  SEM. Significance was determined by two-tailed Student's  $t$  test (\*,  $P < 0.05$ ; \*\*\*,  $P < 0.005$ ; ns, not significant).

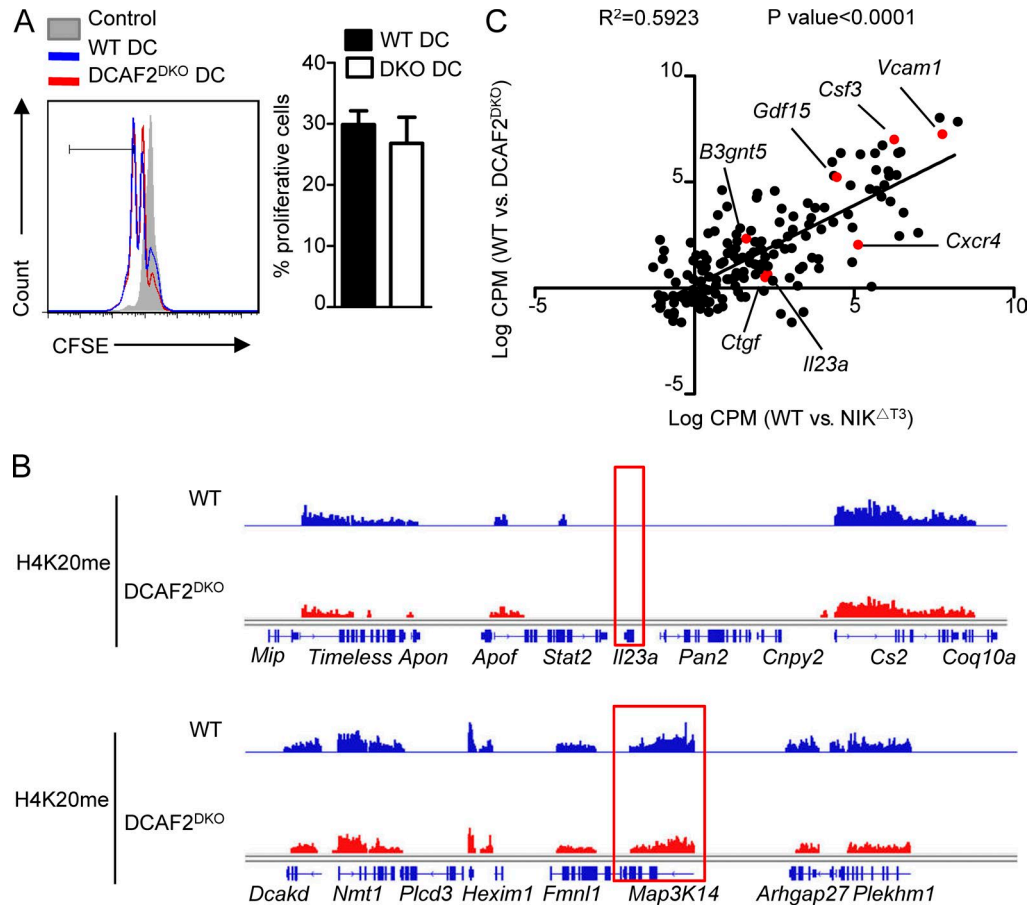

Figure S3. **DCAF2 deficiency regulated noncanonical NF- $\kappa$ B, but not required for its capacity of antigen presentation.** (A) Flow cytometric analysis to measure the proliferation of CFSE-labeled OTII T cells incubated with either medium control or OVA-pulsed WT and DCAF2<sup>DKO</sup> Spl DCs. (B) Snapshot of the H4K20me1 ChIP-Seq signal at the *Il23a* and *Map3k14*. The arrow indicates the location of the ChIP primer pairs. (C) Correlation analysis of overlapped DEGs expression between WT versus NIK<sup>ΔT3</sup> and WT versus DCAF2 KO BMDCs. Noncanonical NF- $\kappa$ B targeted genes were labeled as red plots. Data in A are representative of three independent experiments. Error bars show mean  $\pm$  SEM. Significance was determined by two-tailed Student's *t* test.

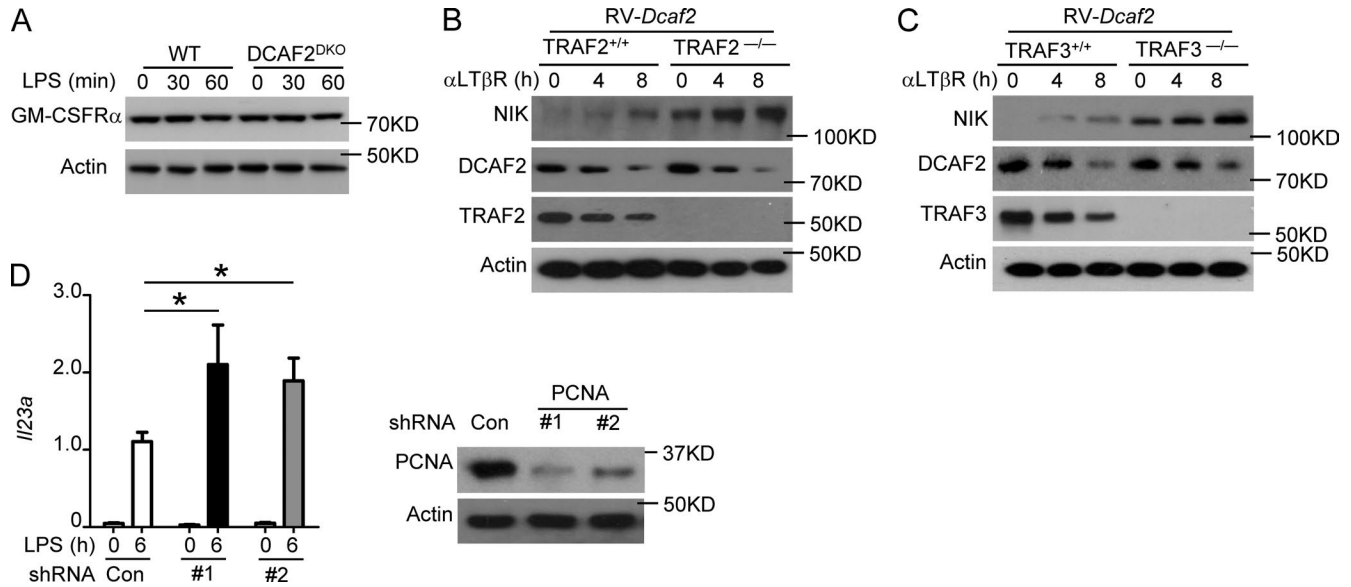

Figure S4. **DCAF2 negatively regulates NIK stability independent of TRAF2 or TRAF3.** (A) IB analyses of GM-CSFR $\alpha$  and actin levels in total lysates of WT and DCAF2 KO BMDCs. (B and C) WT, TRAF2<sup>-</sup> (B) or TRAF3-deficient (C) MEFs reconstituted with WT DCAF2 with retroviral vectors. IB analysis of the indicated proteins in reconstituted MEFs stimulated with  $\alpha$ LT $\beta$ R. (D) WT BM cells were incubated with GM-CSF, and infected with pGIPZ lentiviral vectors encoding a nonsilencing control shRNA (C) or two different Pcn $\alpha$ -specific shRNAs at 24 h. After 7 d, GFP<sup>+</sup> cells were sorted with FACS and then stimulated with LPS as indication. qRT-PCR analysis of the *Il23a* expression. Whole-cell lysates was subjected to IB to detect the PCNA level. Data are representative of three independent experiments. Error bars show mean  $\pm$  SEM. Significance was determined by two-tailed Student's *t* test (\*, *P* < 0.05).

Fig. 5A

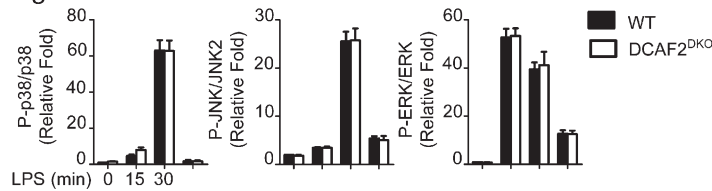

Fig. 5B

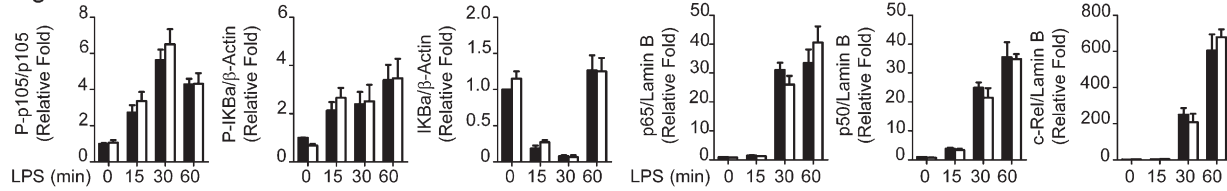

Fig. 5C

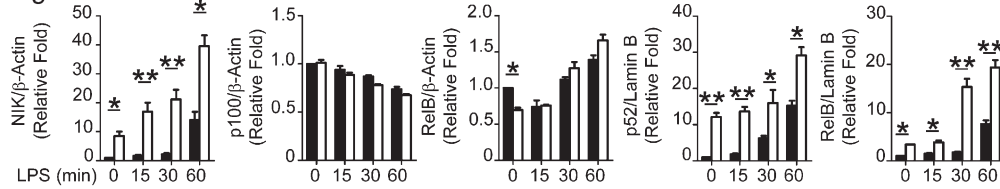

Fig. 5E

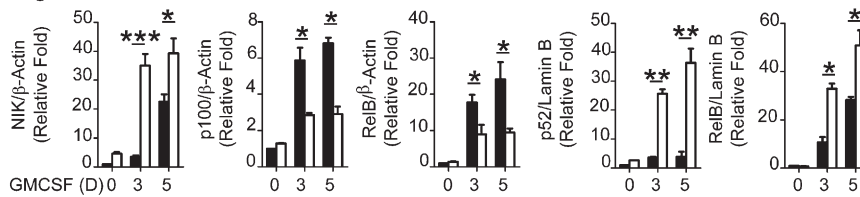

Fig. 5H

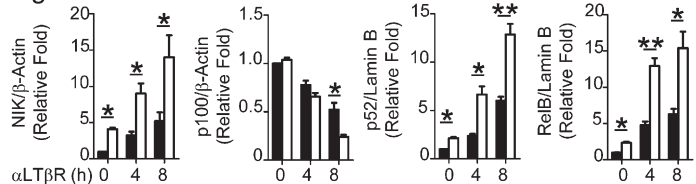

Fig. 7E

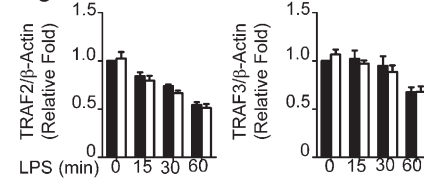

Fig. 7F

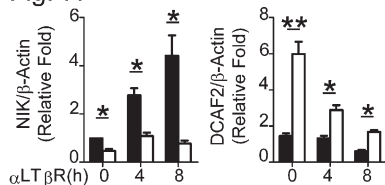

Fig. 7G

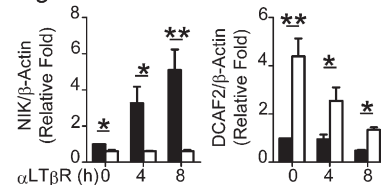

Fig. 7H

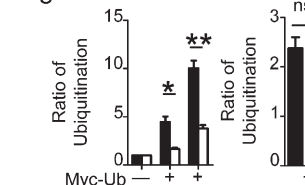

Fig. 7K

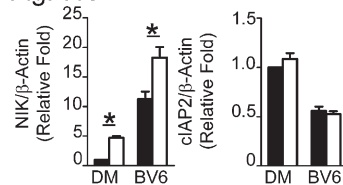

Fig. 8A

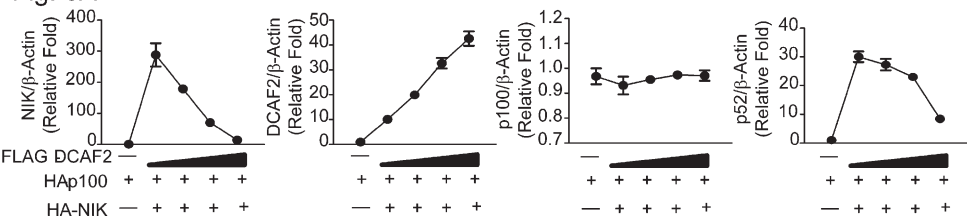

Figure S5. **The relative density of Western blot result.** In IB and IP experiments, the relative density of bands was measured using ImageJ for at least three times. Data are representative of three independent experiments. Error bars show mean  $\pm$  SEM. Significance was determined by two-tailed Student's *t* test (\*,  $P < 0.05$ ; \*\*,  $P < 0.01$ ; \*\*\*,  $P < 0.005$ ).
